## 1 Mammals adjust diel activity across gradients of urbanization

2  
3 Travis Gallo<sup>\*1,2</sup>, Mason Fidino<sup>2</sup>, Brian Gerber<sup>3</sup>, Adam A. Ahlers<sup>4</sup>, Julia L. Angstmann<sup>5</sup>, Max  
4 Amaya<sup>6</sup>, Amy L. Concilio<sup>7</sup>, David Drake<sup>8</sup>, Danielle Gray<sup>9</sup>, Elizabeth W. Lehrer<sup>2</sup>, Maureen H.  
5 Murray<sup>2</sup>, Travis J. Ryan<sup>5</sup>, Colleen Cassidy St. Clair<sup>10</sup>, Carmen M. Salsbury<sup>5</sup>, Heather A.  
6 Sander<sup>11</sup>, Theodore Stankowich<sup>6</sup>, Jacque Williamson<sup>12</sup>, J. Amy Belaire<sup>13</sup>, Kelly Simon<sup>14</sup>, Seth B.  
7 Magle<sup>2</sup>

- 8
- 9 1. Environmental Science and Policy, College of Science, George Mason University,  
10 Fairfax, VA 22030 USA
- 11 2. Urban Wildlife Institute, Conservation and Science Department, Lincoln Park Zoo,  
12 Chicago, IL 60614 USA
- 13 3. Department of Natural Resource Science, The University of Rhode Island, Kingston, RI  
14 02881, USA
- 15 4. Department of Horticulture and Natural Resources, Kansas State University, Manhattan,  
16 KS 66502 USA
- 17 5. Department of Biological Sciences and Center for Urban Ecology and Sustainability,  
18 Butler University, Indianapolis, IN 46208 USA
- 19 6. Department of Biological Sciences, California State University Long Beach, Long Beach,  
20 CA 90840 USA
- 21 7. Department of Environmental Science and Policy, St. Edward's University, Austin, TX  
22 78704 USA
- 23 8. Austin Parks and Recreation, City of Austin, TX 78704 USA
- 24 9. Department of Forest and Wildlife Ecology, University of Wisconsin-Madison, Madison,  
25 WI 53706, USA
- 26 10. Department of Biological Sciences, University of Alberta, Edmonton, Canada
- 27 11. Department of Geographical and Sustainability Sciences, University of Iowa, Iowa City,  
28 IA 52242 USA
- 29 12. Department of Education & Conservation, Brandywine Zoo, Wilmington, Delaware,  
30 19802 USA
- 31 13. The Nature Conservancy in Texas, San Antonio, Texas 78215 USA
- 32 14. Texas Parks and Wildlife, Austin, Texas 78774 USA

33  
34 \*Corresponding Author: Travis Gallo

35 **Email:** [hgallo@gmu.edu](mailto:hgallo@gmu.edu)

36  
37 **Author Contributions:** T. Gallo developed the idea, analyzed the data, wrote the first draft of  
38 the manuscript, and made figures. M. Fidino and B. Gerber helped develop the idea, analyzed  
39 data, made figures, and contributed significantly to the first draft of the manuscript. All authors  
40 provided extensive comments on subsequent drafts of the manuscript. All authors save for C. St.  
41 Clair contributed data to this manuscript.

### 42 43 **Abstract**

44 Time is a fundamental component of ecological processes. How animal behavior changes over  
45 time has been explored through well-known ecological theories like niche partitioning and  
46 predator-prey dynamics. Yet, changes in animal behavior within the shorter 24-hour light-dark  
47 cycle have largely gone unstudied. Understanding if an animal can adjust their temporal activity

48 to mitigate or adapt to environmental change has become a recent topic of discussion and is  
49 important for effective wildlife management and conservation. While spatial habitat is a  
50 fundamental consideration in wildlife management and conservation, temporal habitat is often  
51 ignored. We formulated a temporal resource selection model to quantify the diel behavior of  
52 eight mammal species across ten U.S. cities. We found high variability in diel activity patterns  
53 within and among species and species-specific correlations between diel activity and human  
54 population density, impervious land cover, available greenspace, vegetation cover, and mean  
55 daily temperature. We also found that some species may modulate temporal behaviors to manage  
56 both natural and anthropogenic risks. Our results highlight the complexity with which temporal  
57 activity patterns interact with local environmental characteristics, and suggest that urban  
58 mammals may use time along the 24-hour cycle to reduce risk, adapt, and therefore persist in  
59 human-dominated ecosystems.

60

61 **Keywords:** behavior, human disturbance, nocturnality, temporal partitioning, urban wildlife

62

### 63 **Introduction**

64 Time is a fundamental axis that shapes ecological systems. Regarding animal behavior, time and  
65 space are linked in that the spatial characteristics of an animal's local environment influences its  
66 temporal behavior (Kronfeld-Schor and Dayan, 2003). For example, some species make seasonal  
67 changes in diel (24-hour period) activity to be most active during optimal temperatures in their  
68 local environment (Maloney et al., 2005), and other species temporally partition themselves from  
69 heterospecific competition or aggression (Kronfeld-Schor and Dayan, 2003; van der Vinne et al.,  
70 2019). While temporal behavior has yet to become a major focus in animal ecology (Gaston,  
71 2019; Kronfeld-Schor and Dayan, 2003), how animals use time as an ecological resource has  
72 inspired well-known ecological phenomenon like niche partitioning (Schoener, 1974) and  
73 predator-prey dynamics (Tambling et al., 2015). From an applied perspective, understanding if  
74 an animal can make temporal adjustments to mitigate or adapt to local environmental change  
75 remains a topic of discussion (Wolkovich et al., 2014), and is important for effective wildlife  
76 management and conservation (Levy et al., 2019).

77

78 Species that persist in human-dominated environments, like cities, require some degree of human  
79 avoidance to safely navigate these complex landscapes (Gehrt et al., 2009; Murray and St. Clair,  
80 2015; Riley et al., 2003). In urban ecosystems, few habitat patches remain for animals to seek  
81 spatial refuge when confronted with human disturbance and/or negative interactions with other  
82 species. In these cases, temporally partitioning from these potentially dangerous interactions  
83 might be an alternative strategy. A recent global meta-analysis suggests that mammals become  
84 more nocturnal in areas with greater human disturbance (Gaynor et al., 2018). However, only  
85 7.8% (n = 11) of these studies assessed changes in nocturnal activity in urban areas, and all  
86 explored these changes categorically between urban and non-urban areas. Binary urban and rural  
87 categorizations generally fail to capture variation in urban development and cannot generate  
88 generalizable results that correlate to other cities (McDonnell and Pickett, 1990). Additionally,  
89 cities are unique and differ in size, land use, growth patterns, and human culture (Pacione, 2009).  
90 Variation in both spatial and temporal characteristics within and among cities could have  
91 differing effects on animal behavior. Thus, key questions remain regarding the way in which  
92 animal diel activity varies across gradients of urbanization and among differing cities. For  
93 example, the magnitude of change in diel activity patterns may be larger for more densely

94 urbanized cities or may depend on regional variation in day and night-time temperatures. Multi-  
95 city investigations that include variation in urban intensity and regional climate can elucidate  
96 such patterns.

97  
98 Gaynor et al. (2018) found that most studies in urban environments also focused on carnivore  
99 species, highlighting a gap in our understanding regarding changes in diel activity across taxa.  
100 For example, carnivores likely avoid humans in both space and time because of inimical human  
101 interactions (Clinchy et al., 2016; Kitchen et al., 2000). This may not be the case for mammals  
102 that do not regularly come in conflict with humans or do not evoke such visceral reactions by  
103 humans. Additionally, some species may be constrained by their morphology (e.g., number and  
104 type of cones and rods in their eyes) or may otherwise lack the ability to be active in alternative  
105 lighting. To fully understand the variability of activity patterns and assess temporal adjustments  
106 in response to urban development, a comprehensive examination of the larger suite of urban  
107 mammals and across multiple urban environments is required.

108  
109 While spatial habitat is a fundamental consideration in wildlife management and conservation,  
110 temporal habitat is often ignored (Gaston, 2019). Here, we link spatial landscape characteristics  
111 with the diel activity patterns of eight terrestrial mammals using remote cameras deployed across  
112 ten U.S. cities. Our objectives were to 1) determine which species change their diel activity  
113 across gradients of urbanization and identify what characteristics of the urban environments have  
114 the strongest association with changes in diel activity and 2) assess whether urbanization  
115 influences nocturnal behavior and identify what characteristics of urban environments have the  
116 strongest influence on changes in nocturnal behavior.

117  
118 We found high variability in diel activity patterns within and among species and species-specific  
119 correlations between diel activity and human population density, impervious land cover,  
120 available greenspace, vegetation cover, and mean daily temperature. Our results indicate that in  
121 high-risk environments, such as cities, animals may reduce risk by modulating their temporal  
122 habitat use. Our study identifies a potential mechanism by which urban wildlife species may  
123 adapt to human-dominated environments, and provides critical insight into activity patterns of  
124 urban wildlife that will prove useful for managing these species in cities

## 125 126 **Results**

127 To quantify changes in mammal diel activity in response to urbanization, we used camera  
128 detection data for eight common urban mammal species: bobcat (*Lynx rufus*), coyote (*Canis*  
129 *latrans*), red fox (*Vulpus vulpus*), raccoon (*Procyon lotor*), striped skunk (*Mephitis mephitis*),  
130 eastern cottontail (*Sylvilagus floridanus*), Virginia opossum (*Didelphis virginiana*), and white-  
131 tailed deer (*Odocoileus virginianus*). Cameras were deployed in a systematic fashion across ten  
132 U.S. metropolitan areas as part of the Urban Wildlife Information Network: Austin, TX,  
133 Chicago, IL, Denver, CO, Fort Collins, CO, Indianapolis, IN, Iowa City, IA, Orange County,  
134 CA, Madison, WI, Manhattan, KS, and Wilmington, DE (and Fidino et al., 2021 for details; see  
135 Magle et al., 2019).

136  
137 Across 41,594 trap nights (Table S1), we captured 79,659 total unique detection events. Total  
138 detections per species ranged from 102-34,931, and each species was detected in 5-10 cities at an  
139 average proportion of 0.16-0.77 sites per city (Table 1). Bobcat occurred at the lowest number of

140 cities and proportion of sites, while raccoon occurred in all 10 cities and at the greatest  
141 proportion of sites (Table 1, see Table S2 for the proportion of sites in each city). The number of  
142 detections captured throughout the 24-hour diel period varied among species (Table 1).

143  
144 *Modeling diel activity*

145 We formulated a hierarchical multinomial model to quantify the diel behavior of each species  
146 and assess the effects that available greenspace, vegetation cover, impervious land cover, human  
147 population density, and daily temperature had on diel behavior of each species. Our approach  
148 operates similar to resource selection functions in which resources are selected in space.  
149 However, substituting time for space allowed us to quantify changes in diel activity across  
150 gradients of environmental change. This temporal resource selection model allowed us to  
151 estimate temporal ‘selection’ and the probability of ‘use’ in each time category. Coefficient  
152 estimates are estimates of selection for a particular time category relative to the available time in  
153 the respective category and the difference from the reference time category (‘day’).  
154 Exponentiated coefficient estimates greater than one indicates selection and less than one  
155 indicates avoidance, relative to the day reference category. Using the softmax function  
156 (Kruschke, 2011), we also estimated the influence that each predictor variable had on the  
157 probability of activity in each time category, including the ‘day’ category.

158  
159 *Among city variation in diel activity patterns*

160 We found that most species, on average, had a higher probability of being nocturnal (active at  
161 night or during the darkest portions of night) with the exception of bobcat and white-tailed deer  
162 (Fig. 1 and 2). Most species showed variation in diel activity among cities (e.g., bobcat; Fig. 1),  
163 and some species (e.g., eastern cottontail, coyote, red fox, and bobcat) exhibited profound  
164 variation in diel activity across individual sampling sites (Fig. 2). For example, the predicted  
165 probability of nocturnal behavior for eastern cottontail at each sampled site ranged from 0.15 –  
166 0.69 (see Table S3 for a full set of ranges for each species and each time category).

167

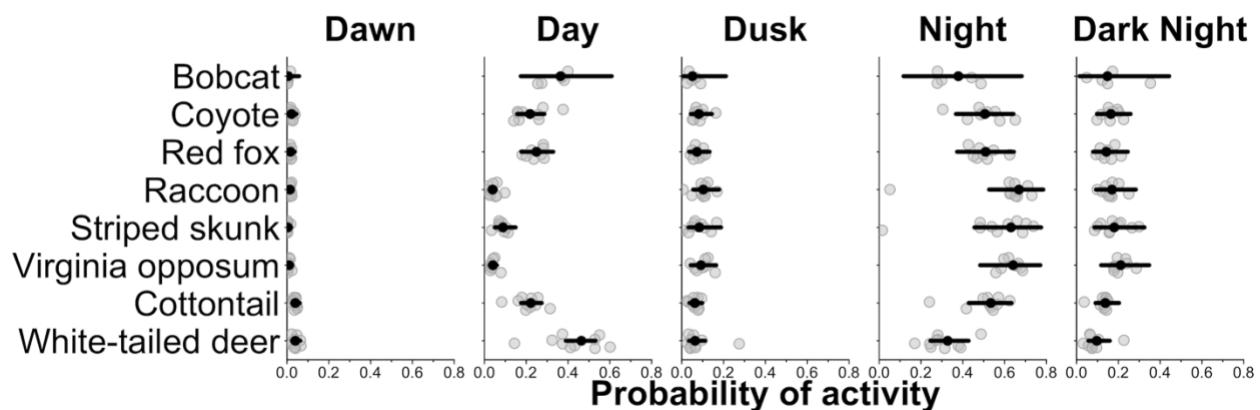

168  
169 **Figure 1.** City-specific probability of activity for each species. Grey points are city specific  
170 estimates of the average probability of activity in each time category. The black point indicates  
171 the average probability of activity among cities and the horizontal lines are 95% credible interval  
172 for the average probability estimates among cities. Wider credible intervals indicate more  
173 variation among cities.

174 **Table 1.** The total number of detections for each species, number of cities each species was detected in, mean proportion of sites each  
 175 species was detected at per city, and total number of detections in each time category for eight urban mammal species across ten U.S.  
 176 metropolitan areas between January 2017 and December 2018.  
 177

| Species            | Total detections | No. of cities species detected | Mean proportion of sites species detected per city | No. of 'day' detections | No. of 'dawn' detections | No. of 'dusk' detections | No. of 'night' detections | No. of 'darkest night' detections |
|--------------------|------------------|--------------------------------|----------------------------------------------------|-------------------------|--------------------------|--------------------------|---------------------------|-----------------------------------|
| Bobcat             | 102              | 5                              | 0.16                                               | 29                      | 1                        | 9                        | 45                        | 18                                |
| Coyote             | 2732             | 9                              | 0.63                                               | 671                     | 98                       | 256                      | 1318                      | 389                               |
| Eastern cottontail | 16102            | 10                             | 0.61                                               | 3984                    | 619                      | 1097                     | 8317                      | 2085                              |
| Raccoon            | 34931            | 10                             | 0.77                                               | 2638                    | 642                      | 3767                     | 21723                     | 6161                              |
| Red fox            | 1570             | 8                              | 0.51                                               | 441                     | 35                       | 152                      | 744                       | 198                               |
| Striped skunk      | 990              | 10                             | 0.24                                               | 89                      | 24                       | 98                       | 584                       | 195                               |
| Virginia opossum   | 8357             | 8                              | 0.7                                                | 407                     | 116                      | 1027                     | 5087                      | 1720                              |
| White-tailed deer  | 14875            | 10                             | 0.56                                               | 7965                    | 658                      | 816                      | 4299                      | 1137                              |

178

179

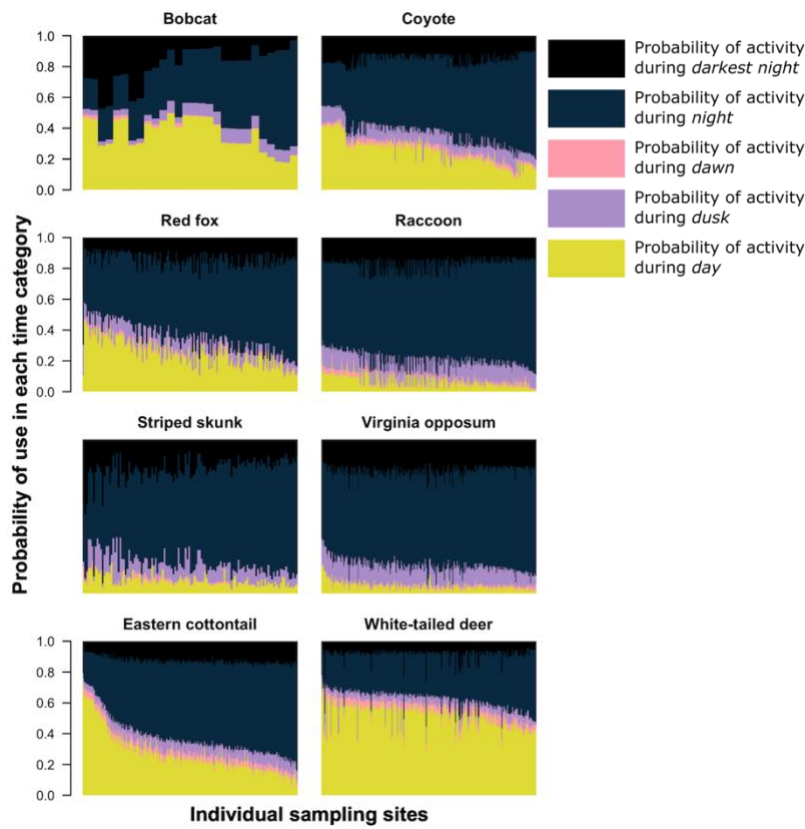

180

181 **Figure 2.** The predicted probability of activity in each time category at each sampling site (x-  
182 axis) the species was detected. Each column on the x-axis is a stacked bar plot representing the  
183 probability of activity in each time category at each sampling site. For each bar plot, all  
184 categories sum to one. Sampling sites along the x-axis are ordered from the lowest probability of  
185 nocturnal activity to the highest.

186

### 187 *Selection for particular time categories*

188 Of the three predator species that we analyzed (coyote, bobcat, and red fox), we found that  
189 anthropogenic and natural features were associated with variation in diel activity for only coyote  
190 and red fox (Fig. 3a,b,c). Coyote selected for both nocturnal and crepuscular hours in areas of  
191 greater human population densities (Fig. 3b), and red fox avoided nocturnal hours in areas with  
192 more available greenspace (Fig. 3c). Seasonality also had an effect on both coyote and fox diel  
193 activity. Coyote selected for dawn hours (Fig. 3b) and red foxes selected for dusk hours during  
194 periods of higher daily average temperatures (Fig. 3c). We found no evidence that bobcats varied  
195 their diel activity across our environmental variables (Fig. 3a).

196

197 We found diel activity for all omnivore and herbivore species was affected by anthropogenic  
198 features. Raccoon, eastern cottontail, and white-tailed deer avoided nighttime hours in areas of  
199 greater human population density (Fig 3d,g,h), whereas Virginia opossum selected for nighttime  
200 and dusk hours in areas with greater human densities (Fig. 3f). Raccoon, striped skunk, and  
201 white-tailed deer all selected for nighttime hours in areas with greater impervious land cover  
202 (Fig. 3d,e,h).

203

204

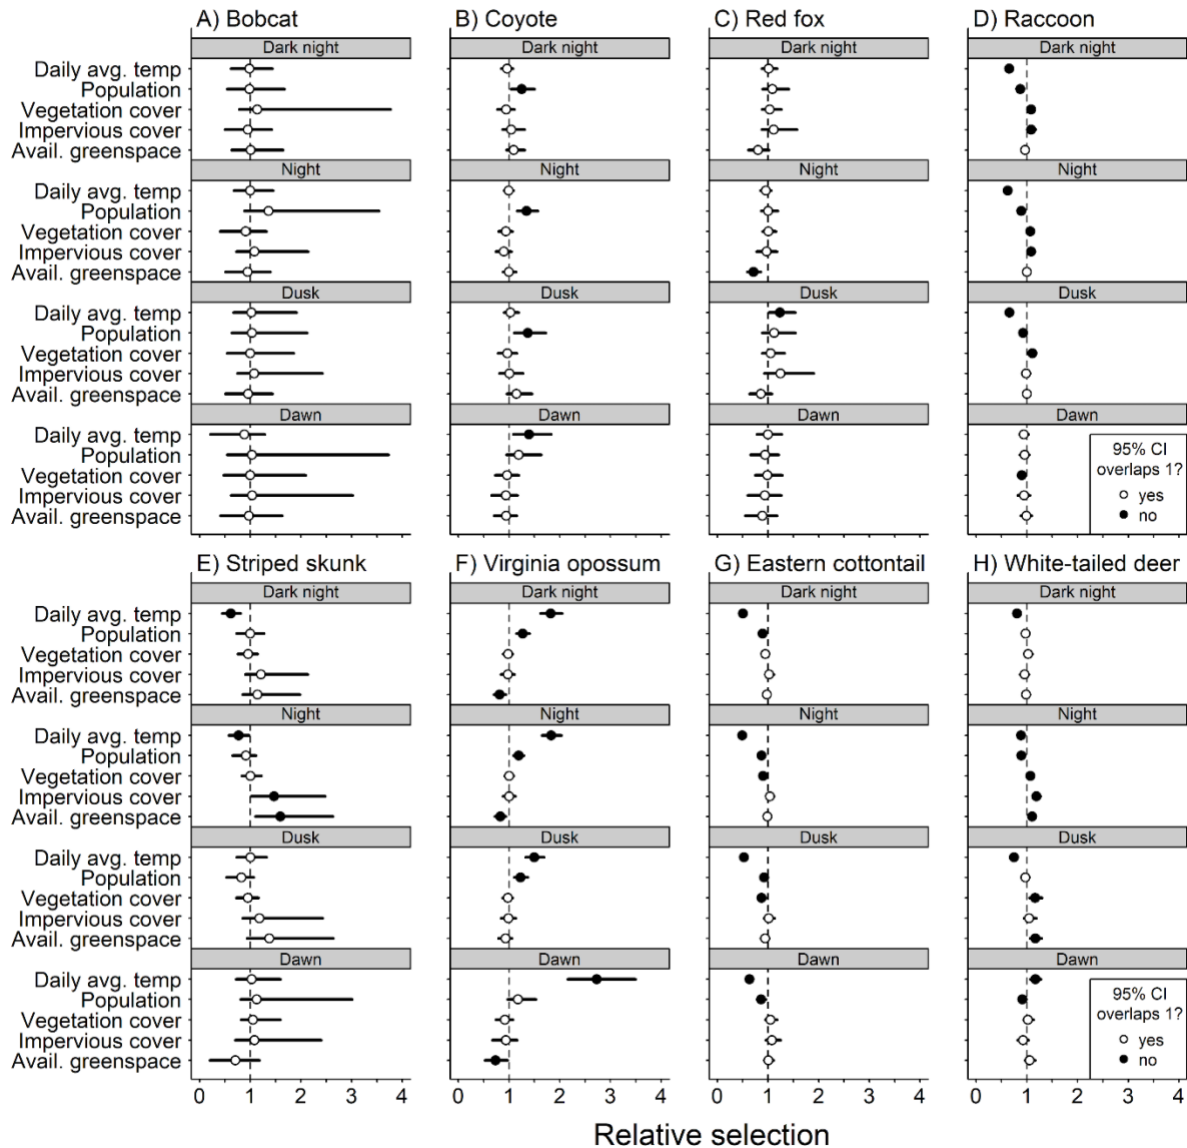

205

206

207

208

209

210

211

212

213

214

215

216

217

218

**Figure 3.** Mean (circle) and 95% credible intervals of estimated coefficients from natural and anthropogenic features on temporal selection of dark night, night, dusk, and dawn relative to day.

Natural features were also associated with variation in diel activity for omnivore and herbivore species. As vegetation cover increased, eastern cottontails were more likely to select daytime hours (Fig. 3g), whereas raccoons and white-tailed deer were more likely to select for nighttime hours and dusk (Fig. 3d,h). As available greenspace increased, striped skunk were more likely to select nighttime hours (Fig. 3e), whereas Virginia opossum were less likely to select nighttime and dawn hours (Fig. 3f). White-tailed deer were also more likely to select nighttime and dusk hours as available greenspace increased (Fig. 3h).

We found seasonality effects on all omnivore and herbivore species. Virginia opossum were more likely to avoid daytime hours as temperatures increased (Fig. 3f). Daily average

219 temperature had a positive relationship with diurnal selection for raccoons, striped skunk, and  
220 white-tailed deer (Fig. 3,d,e,h). Eastern cottontails, however, were more likely to select  
221 crepuscular hours and nighttime hours as daily average temperatures increased (Fig. 3g).

222  
223 *Probability of nocturnal activity*

224 Across all species, the probability of dawn and dusk activity was low (Figure 2 and 3).  
225 Therefore, we report the probability of nocturnal activity for each species by combining the  
226 probability of activity during night and darkest night. Coyote had a lower probability of being  
227 nocturnal in areas with lower human densities, but that probability increased significantly as  
228 human population increased (Fig. 4). With a one standard deviation (hereafter sd) increase from  
229 the mean human population density (from 1,512 – 3,095 people/km<sup>2</sup>), coyotes are 19% more  
230 likely to use nighttime hours and 38% more likely with a two sd increase from 1,512 to 4,678  
231 people/km<sup>2</sup> (Table 2). Red fox was the only species that had a significant change in the  
232 probability of nocturnal use across the available greenspace gradient (Fig. 4). Red fox were 23%  
233 less likely to use nighttime hours with a one sd increase in available greenspace from 0.41 to  
234 0.57, and 41% less likely with a sd increase from 0.41 to 0.73 (Table 2). Note that predictor  
235 values vary because they were collected at species-specific scales and not all species were  
236 detected at the same sites.

237  
238 White-tailed deer, eastern cottontail, and raccoon had a greater probability of being active at  
239 night where human densities were low; this probability decreased as human population increased  
240 (Fig. 4). White-tailed deer were 8% less likely to use nighttime hours with a one sd increase in  
241 population density from 1,515 to 3,003 people/km<sup>2</sup>, eastern cottontail were 9% less likely (from  
242 2,226 to 4,633 people/km<sup>2</sup>), and raccoon were 16% less likely (from 1,763 to 3,789 people/km<sup>2</sup>;  
243 Table 2). With a two sd increase in impervious cover (1,515 to 4,491 people/km<sup>2</sup> for white-tailed  
244 deer, 2,226 to 7,040 for eastern cottontail, and 1,763 to 5,815 for raccoon), white-tailed deer  
245 were 16% less likely to be nocturnal, eastern cottontail 18% less likely, and raccoon 12% less  
246 likely to be nocturnal (Table 2). Conversely, white-tailed deer and raccoon showed a positive  
247 relationship with increased impervious cover and nocturnality (Fig. 4). White-tailed deer were  
248 13% more likely to be active at night with a one sd increase in impervious cover from 0.16 to  
249 0.31 and 29% more likely with a two sd increase from 0.16 to 0.45 (Table 2). Raccoons were  
250 10% more likely to be active at night with a one sd increase in impervious cover and 21% more  
251 likely with an a two sd increase (Table 2).

252  
253 Vegetation cover had a negative effect on the probability of nocturnal behavior of eastern  
254 cottontail (Fig. 4). Cottontail were 7% less likely to be nocturnal when the proportion of  
255 vegetation cover increased one sd above the mean from 0.67 to 0.92, and 14% less likely to be  
256 nocturnal when vegetation cover increased two sd above the mean from 0.67 to 1 (Table 2). We  
257 also found that white-tailed deer were 5% more likely to use nighttime hours when the  
258 proportion of available greenspace increased one sd above the mean from 0.52 to 0.75) and 11%  
259 more likely with an increase of two sd from the mean from 0.52 to 0.98 (Table 2). However,  
260 Virginia opossum were 12% less likely to be nocturnal with a one sd increase in available  
261 greenspace from 0.34 to 0.57 and 23% less likely with an increase of two sd from 0.34 to 0.78  
262 (Table 2).

263



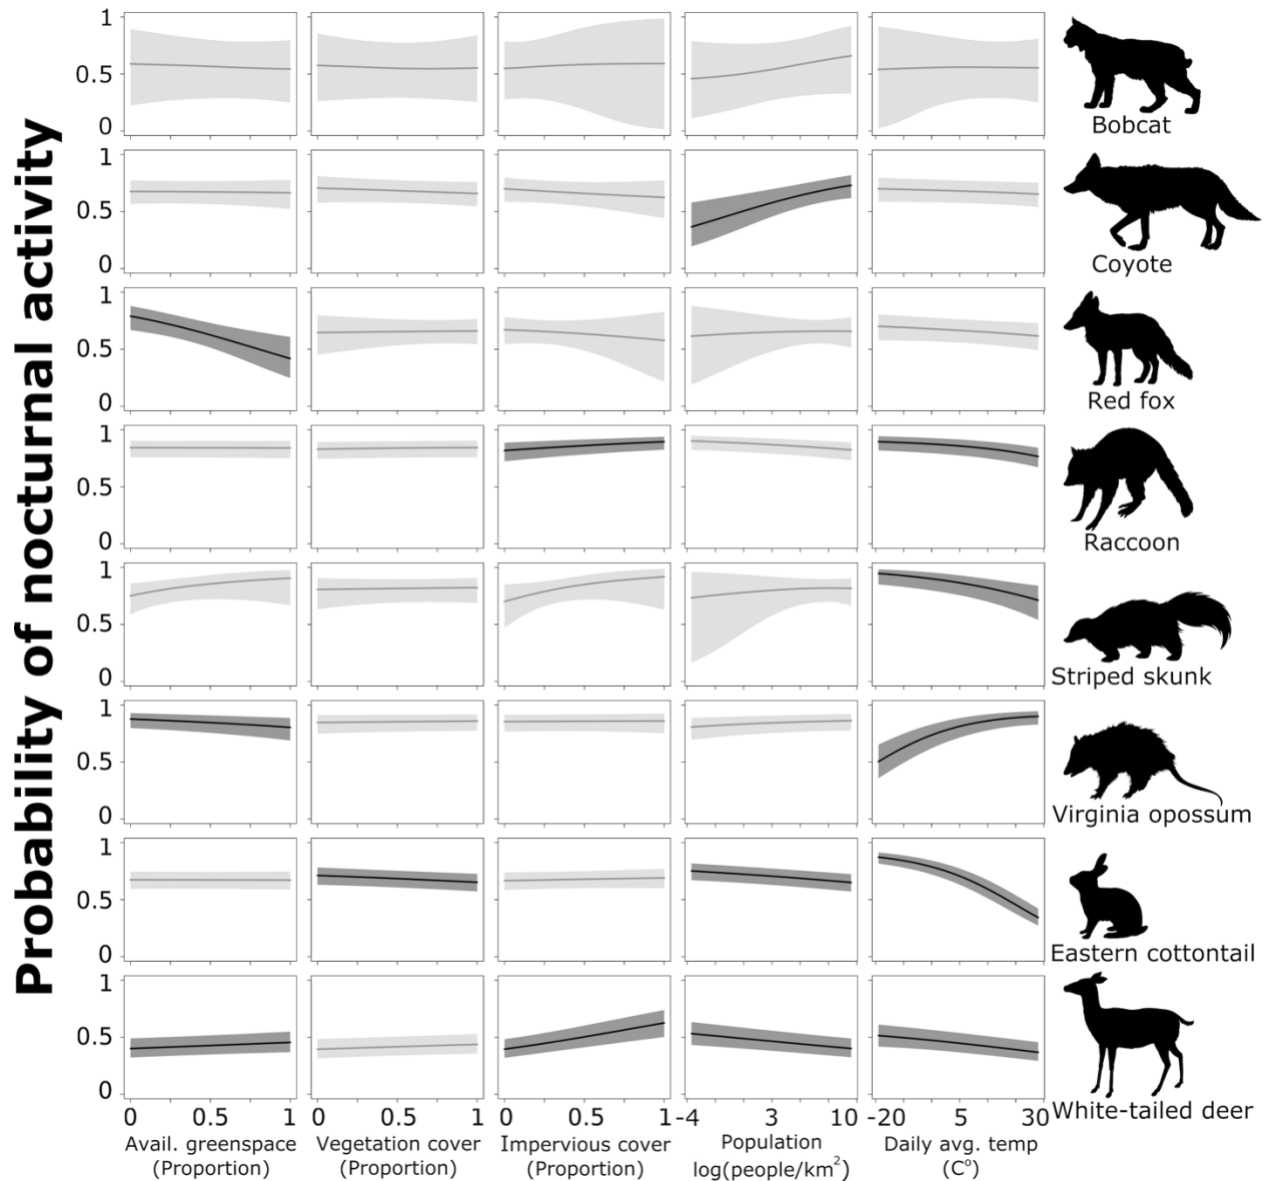

264  
265

266 **Figure 4.** Probability of nocturnal activity (night and dark-night combined) across each of our  
267 natural and anthropogenic characteristics of the urban environment. Solid line indicates the  
268 median predicted line and shaded areas are 95% credible interval. Darker shading represent the  
269 relationships whose odds ratios did not overlap 1.

270  
271  
272

**Table 2.** Odds ratios for each predictor variable and a one and two standard deviation increase across their values. Bolded text indicates scenarios where the 95% credible intervals do not overlap 1.

|                    | Available greenspace    |                         | Impervious cover        |                        | Vegetation Cover        |                         | Human pop. density      |                         | Daily avg. temp.        |                         |
|--------------------|-------------------------|-------------------------|-------------------------|------------------------|-------------------------|-------------------------|-------------------------|-------------------------|-------------------------|-------------------------|
|                    | 1-unit increase         | 2-unit increase         | 1-unit increase         | 2-unit increase        | 1-unit increase         | 2-unit increase         | 1-unit increase         | 2-unit increase         | 1-unit increase         | 2-unit increase         |
| Bobcat             | 0.97 (0.62-1.38)        | 0.95 (0.40-1.95)        | 1.03 (0.70-1.76)        | 1.06 (0.46-3.16)       | 0.98 (0.55-1.56)        | 0.99 (0.36-3.00)        | 1.22 (0.85-2.81)        | 1.51 (0.72-8.28)        | 0.99 (0.71-1.37)        | 0.99 (0.49-1.89)        |
| Coyote             | 0.99 (0.88-1.11)        | 0.97 (0.76-1.23)        | 0.94 (0.80-1.08)        | 0.88 (0.64-1.18)       | 0.95 (0.82-1.06)        | 0.90 (0.68-1.13)        | <b>1.19 (1.04-1.36)</b> | <b>1.38 (1.05-1.81)</b> | 0.95 (0.87-1.03)        | 0.89 (0.75-1.05)        |
| Red fox            | <b>0.77 (0.65-0.90)</b> | <b>0.59 (0.41-0.81)</b> | 0.95 (0.77-1.15)        | 0.90 (0.58-1.33)       | 1.01 (0.90-1.13)        | 1.01 (0.80-1.28)        | 1.00 (0.87-1.17)        | 1.00 (0.74-1.36)        | 0.92 (0.83-1.02)        | 0.85 (0.68-1.03)        |
| Raccoon            | 1.00 (0.96-1.03)        | 0.99 (0.92-1.07)        | <b>1.10 (1.05-1.16)</b> | <b>1.21 (1.1-1.34)</b> | 1.01 (0.97-1.05)        | 1.02 (0.94-1.10)        | <b>0.94 (0.90-0.97)</b> | <b>0.88 (0.81-0.95)</b> | <b>0.82 (0.77-0.87)</b> | <b>0.65 (0.57-0.73)</b> |
| Striped skunk      | 1.26 (0.93-1.76)        | 1.55 (0.82-3.00)        | 1.26 (0.92-1.83)        | 1.56 (0.80-3.31)       | 1.02 (0.86-1.21)        | 1.03 (0.74-1.46)        | 1.01 (0.79-1.22)        | 0.99 (0.57-1.46)        | <b>0.73 (0.58-0.90)</b> | <b>0.54 (0.34-0.81)</b> |
| Virginia opossum   | <b>0.88 (0.81-0.96)</b> | <b>0.77 (0.65-0.92)</b> | 1.01 (0.91-1.12)        | 1.02 (0.83-1.25)       | 1.02 (0.95-1.09)        | 1.04 (0.91-1.18)        | 1.04 (0.97-1.12)        | 1.08 (0.93-1.24)        | <b>1.27 (1.15-1.38)</b> | <b>1.49 (1.16-1.77)</b> |
| Eastern cottontail | 1.00 (0.95-1.04)        | 1.00 (0.91-1.08)        | 1.02 (0.97-1.09)        | 1.05 (0.94-1.18)       | <b>0.93 (0.88-0.98)</b> | <b>0.86 (0.78-0.95)</b> | <b>0.91 (0.87-0.95)</b> | <b>0.82 (0.75-0.89)</b> | <b>0.57 (0.54-0.61)</b> | <b>0.31 (0.28-0.35)</b> |
| White-tailed deer  | <b>1.05 (1.00-1.10)</b> | <b>1.11 (1.00-1.22)</b> | <b>1.14 (1.07-1.21)</b> | <b>1.3 (1.15-1.46)</b> | 1.04 (0.99-1.09)        | 1.08 (0.98-1.18)        | <b>0.92 (0.88-0.96)</b> | <b>0.85 (0.78-0.92)</b> | <b>0.88 (0.84-0.92)</b> | <b>0.77 (0.71-0.84)</b> |

273

274 Finally, we found an influence of daily average temperature (season) on eastern cottontail,  
275 raccoon, striped skunk, white-tailed deer, and Virginia opossum (Fig. 4). Eastern cottontail were  
276 43% less likely to use nighttime hours with a one sd increase in daily average temperature from  
277 8.17 C to 18.76 C, and 69% less likely with a two sd increase from 8.17 C to 29.36 C (Table 2).  
278 With a one sd increase in temperature from 12.00 C to 21.49 C, raccoon were 18% less likely to  
279 use nighttime hours, and 35% less likely with a two sd increase from 12.00 C to 30.99 C (Table  
280 2). Striped skunk were 27% less likely to exhibit nocturnal behavior with a one sd increase in  
281 daily average temperature from 15.3 C to 24.62 C, and 46% less with a two sd increase from  
282 15.3 C to 33.94 C (Table 2). White-tailed deer were 12% less likely with a one sd increase from  
283 12.01C to 22.65 C and 23% less likely with a two sd increase from 12.01 C to 33.30 C (Table 2).  
284 Virginia opossum, however, were 27% more likely to use nighttime hours with a one sd increase  
285 in daily average temperature from 13.85 C to 22.28 C, and 49% more likely with a two sd  
286 increase from 13.85 C to 30.71 C (Table 2). Again, temperature ranges vary because not all  
287 species were detected at the same sites and same times.

## 288 **Discussion**

290 Ecological processes act across both space and time. We have, however, only just begun to study  
291 how animals use diel-time as an ecological resource to avoid risk and adapt to environmental  
292 change. We quantified the diel behavior of eight mammal species across urban gradients in ten  
293 U.S. cities. Our findings indicated that mammals can modulate their use of time within the 24-  
294 hour diel period as a resource to persist in urban ecosystems. We found that nocturnal activity  
295 had the greatest response to urbanization and seasonality, and that changes in nocturnality in  
296 response to urbanization were species-specific and varied among cities. Our results also  
297 illustrated the complex trade-offs that urban wildlife species must make to contend with both  
298 interspecific interactions (i.e., predation and competition) and human activity. These findings  
299 offer insight into how mammals might use time as a resource to adapt and persist in urban  
300 ecosystems.

301  
302 We found that coyote had a greater probability of nocturnal behavior in areas with greater human  
303 densities. These findings are in agreement with past studies from single cities that documented  
304 increases in coyote nocturnal behavior in areas of higher human activity (Gallo et al., 2019; M. I.  
305 Grindler and Krausman, 2001; Riley et al., 2003; Tigas et al., 2002). Notably, vehicular collisions  
306 are a major mortality factor for coyotes (M. Grindler and Krausman, 2001) and coyotes have been  
307 typically persecuted by humans when they come in close contact (Dunlap, 1988; Young et al.,  
308 2019). Thus, a shift to nocturnal activity when traffic volumes are usually lower and humans are  
309 less active outdoors may be particularly important to survival in urban landscapes (Murray and  
310 St. Clair, 2015).

311  
312 Red fox became less nocturnal as the proportion of local greenspace (i.e., available habitat)  
313 increased, a finding which may be explained by competition with coyote. Coyote and red fox  
314 exhibit a clear dominance hierarchy, whereby the dominant coyote negatively affects the  
315 subordinate red fox via competition and predation (Gosselink et al., 2003). Research has shown  
316 that urban coyotes occupy larger areas of greenspace (Gehrt et al., 2009). When more greenspace  
317 is available around a site, and presumably a higher probability of coyote presence, red foxes may  
318 become more diurnal to temporally avoid coyotes and reduce the risk of an interaction. Yet,

319 when greenspace is limited, and presumably there is a lower probability of coyote presence, red  
320 foxes could be more active during nighttime hours with less risk of an interaction.

321  
322 In most cases, the human aspects of urban environments captured by our predictor variables had  
323 opposite effects on omnivores and herbivores. While human population densities increased  
324 nocturnal activity for coyote, it decreased nocturnal activity for white-tailed deer, eastern  
325 cottontail, and raccoon. Prey species are known to spatially distribute themselves near human  
326 activity to act as a shield from predators (Berger, 2007; Shannon et al., 2014). In these cases,  
327 prey species may also utilize time as a human-mediated shield, exhibiting more activity at times  
328 of high human activity (daytime) in areas of high human densities. These results may seem  
329 counterintuitive given that increasing impervious cover increased the probability of nocturnal  
330 behavior exhibited by deer and raccoon (Fig. 4) and selection for nighttime hours by striped  
331 skunk (Fig. 3). However, a majority of impervious surfaces in the U.S. are roads and parking lots  
332 – places of high vehicular traffic (Frazer, 2005). Similar to coyote, vehicular collisions are a  
333 major source of mortality for these species (Glista et al., 2009). Therefore, a shift to nocturnal  
334 activity in areas with high impervious cover may be particularly important to their survival in  
335 cities and a sign of fine-scale modulation of temporal selection based on local environments.

336  
337 Similarly, raccoon and white-tailed deer selected more for nighttime hours (Fig. 3) in locations  
338 with high levels of vegetation cover. More vegetation equates to more protective cover.  
339 Therefore, we suggest that raccoons and white-tailed deer can use the same temporal habitat as  
340 their predators (i.e., coyote) – but with less risk – when there is more physical cover. On the  
341 other hand, eastern cottontail were more diurnal with increased vegetation (Fig. 3 and 4),  
342 suggesting that more vegetation cover provides shelter from other perceived threats (i.e.,  
343 humans; 22) and may allow eastern cottontail to select periods of high human activity (i.e. day).  
344 Interactions between various urban characteristics, which we did not examine in this study,  
345 should be further explored to fully understand how these characteristics jointly influence the  
346 temporal patterns of urban wildlife species.

347  
348 Our results highlight the complexity of trade-offs for urban wildlife. In most cases, we found  
349 diverging activity patterns between coyote (a common urban apex predator) and subordinate or  
350 prey species in response to physical characteristics of urban environments. To persist in urban  
351 environments, it appears that urban species may have to modulate behaviors to contend with both  
352 anthropogenic risks and risk from predation or competition. Our results add to a growing body of  
353 literature that indicate species interactions in human-dominated landscapes may be better  
354 understood by explicitly considering the role humans play in those interactions (Berger, 2007;  
355 Blecha et al., 2018; Gallo et al., 2019; Magle et al., 2014).

356  
357 We also found evidence that local climate, specifically temperature, regulated the diel behavior  
358 of many species. For example, white-tailed deer, eastern cottontail, and striped skunk became  
359 more diurnal as temperatures increased, presumably foraging more during the day in warmer  
360 seasons when more vegetation biomass is available. Virginia opossum showed a decrease in  
361 nocturnal behavior at lower temperatures. Given their poor thermoregulation abilities, poorly  
362 insulated fur, and cold-sensitive hands, ears, and tails (Kanda, 2005), it seems likely that Virginia  
363 opossum are morphologically constrained and thus unable to alter their diel activity patterns at  
364 colder temperatures. These results call attention to the importance of considering the impacts of

365 morphology, physiology, and life history on a species' capacity to adapt to environmental  
366 change. Given the interacting effects of climate change and urbanization (Stone, 2012), future  
367 research should explore how life history traits mediate temporal distributions of species activity  
368 – particularly as cities are rapidly warming (Oleson et al., 2015).

369  
370 We did not find changes in diel activity for some species in response to our predictor variables.  
371 These results could be due to a lack of data on a particular species (i.e., bobcat) or because we  
372 did not sample across a large enough urban-rural gradient. Remote regions were not sampled in  
373 our study design, and some species may change their behavior at a lower level of urban intensity  
374 that we did not sample. Combining datasets from more rural and remote areas (e.g., Snapshot  
375 Serengeti (Swanson et al., 2015), Snapshot USA (Cove et al., 2021)) could allow us to identify  
376 the level of human development that elicits changes in diel activity for potentially sensitive  
377 species. Finally, our analysis was limited to the physical characteristics of cities. Additional  
378 characteristics like chronic noise, light pollution, resource supplementation, and species  
379 interactions influence animal behaviors and should be explored in future research .

380  
381 Resource selection functions have been a popular and valuable tool to measure the relationship  
382 between available resources and animal populations, and have been used intensely in wildlife  
383 management and conservation (Strickland and McDonald, 2006). However, very little work has  
384 been done to quantify temporal habitat selection specifically (Cox et al., 2021; Gaston, 2019).  
385 Here, we built upon Farris et al. (Farris et al., 2015) and developed an analytical approach to  
386 quantify temporal resource selection across environmental gradients. While we have developed  
387 an analytical tool to measure temporal selection, a theoretical context for temporal habitat  
388 selection is needed and a further understanding of disproportional selection relative to the  
389 number of hours available is a promising avenue for future animal biology research.

390  
391 Temporal partitioning may facilitate human-wildlife coexistence and effectively increase  
392 available habitats for species in cities. Temporal partitioning may also limit contact between  
393 people and animals, potentially reducing negative encounters like disease transmission and  
394 attacks on people (Gaynor et al., 2018). From a management perspective, ignoring diel behavior  
395 can result in biased estimates of species abundance and patterns of habitat use and lead to  
396 misinformed conservation measures (Gaston, 2019). Additionally, recognizing plasticity in  
397 species behavior can lead to better predictions of vulnerability to anthropogenic disturbances  
398 (Gaynor et al., 2018). Therefore, we recommend that diel activity and temporal partitioning be  
399 considered in conservation and management approaches.

400  
401 We have shown that mammals have significant variation in the use and selection of time  
402 throughout the diel period. Additionally, our approach allowed us – for the first time – to  
403 quantify changes in diel activity across gradients of environmental change and across multiple  
404 urban areas, revealing that changes in diel patterns are influenced by natural and human  
405 landscape characteristics. Our results highlight the need to understand how a larger proportion of  
406 the animal community responds to urbanization, and provide evidence of behavioral plasticity  
407 that allows some species to adapt to and persist in human-dominated systems.

## 408 409 **Materials and Methods**

410

411 *Study Design*

412 The number of sampling sites per city ranged from 24-113 ( $\bar{x} = 45.30$ ,  $sd = 28.65$ ). In each city,  
413 sampling sites were placed along a gradient of urbanization (high to low population density and  
414 impervious cover). At each sampling site ( $n = 453$ ) we placed one Bushnell motion-triggered  
415 infrared Trophy Cam (Bushnell Corp., Overland Park, KS, USA). Sampling sites were located in  
416 greenspaces, such as city parks, cemeteries, natural areas, utility easements, and golf courses. To  
417 increase the detection probability of each species we placed one synthetic fatty acid scent lure in  
418 the camera line of sight, and lures were replaced on two-week intervals if missing to remain  
419 consistent throughout the study. However, Fidino et al. (2020) later found that this type of lure  
420 has little to no effect on the detectability of most urban mammals. We used observation data  
421 collected between January 2017 and December 2018. However, not all cities were sampled  
422 continuously throughout the study period (Table S1).

423

424 *Data processing*

425 For each species, we defined a single detection event as all photos taken within a 15-minute  
426 period at each camera station (Farris et al., 2015; Ridout and Linkie, 2009). We categorized each  
427 detection event as either ‘dawn’, ‘dusk’, ‘day’, ‘night’, and ‘darkest night’ using the *suncalc*  
428 package (Thieurmel and Elmarhraoui, 2019) in R ver 4.2.0 (R Core Team, 2019). The *suncalc*  
429 package defines and calculates ‘dawn’ as starting when morning astronomical twilight begins  
430 and ending when the bottom edge of the sun touches the horizon. ‘Dusk’ was defined as the  
431 beginning of evening twilight to the point when it became dark enough for astronomical  
432 observations. ‘Day’ was defined as the period between dawn and dusk. We considered the  
433 nighttime as two distinct time periods (night and darkest night), because some species may be  
434 nocturnal but use the darkest hours of the night to reduce the risk of human interactions (Gehrt et  
435 al., 2009). We defined ‘night’ as the periods between the end of dusk and one hour before the  
436 darkest moment of the night (when the sun is at the lowest point), and from one hour after the  
437 darkest moment to dawn. The ‘darkest hours’ of the night were categorized as one hour before  
438 and after the darkest moment in the night. We accounted for the date, geographical location, and  
439 daylight savings time of each detection events. Therefore, the amount of time available in each  
440 category could vary geographically and seasonally.

441

442 *Predictor Variables*

443 To assess how characteristics of urban environments influenced diel activity of urban wildlife  
444 mammals, we calculated site-level predictor variables within a fixed-radius buffer around each  
445 sampling site. Fixed-radius buffers varied in size among species and were based on the typical  
446 home range of each species: 500 m fixed-radius buffer for eastern cottontail (Hunt et al., 2014),  
447 Virginia opossum (Fidino et al., 2016; Wright et al., 2012), and white-tailed deer (Etter et al.,  
448 2002); 1 km fixed-radius buffer for striped skunk (Weissinger et al., 2009) and raccoon (Rosatte,  
449 2000), and 1.5 km fixed radius buffer for coyote (Gehrt et al., 2009; Riley et al., 2003), red fox  
450 (Mueller et al., 2018), and bobcat (Riley et al., 2003). In our analysis, we included variables that  
451 described two contrasting characteristics of urban ecosystems, the natural and the human-built  
452 environment (Table S4). We also included average temperature to account for possible seasonal  
453 changes in diel activity.

454

455 *Urban features* – To characterize urbanization around each sampling site, we calculated human  
456 population density (individuals/km<sup>2</sup>) and mean impervious cover (%). Population density was

457 extracted from Block Level Housing Density data (Radeloff et al., 2018) created from 2010 U.S.  
458 Census data (U.S. Census Bureau, 2010). Mean impervious cover was calculated from the 2011  
459 National Land Cover Database (NLCD) 30-m resolution Percent Developed Imperviousness data  
460 (Homer et al., 2015).

461  
462 *Natural features* – To characterize natural features, we calculated the proportion of vegetation  
463 cover and the proportion of available greenspace (i.e., potential habitat) around each site. To  
464 calculate the proportion of vegetation cover around each sampling site, we first calculated the  
465 Normalized Difference Vegetation Index (NDVI) using U.S. Geological Survey 30-m resolution  
466 Landsat 8 data that 1) covered the entire study area of each city, 2) was taken during a summer  
467 month that coincided with the respective city’s sampling period, and 3) contained less than 15%  
468 cloud cover. Landsat 8 imagery was downloaded with R using the *getSpatialData* package  
469 (Schwalb-Willmann, 2019). We then calculated vegetation cover as the proportion of cells within  
470 each fixed-radius buffer that had an NDVI value representing substantial vegetation cover ( $> 0.2$ ;  
471 [https://climatedataguide.ucar.edu/climate-data/ndvi-normalized-difference-vegetation-index-](https://climatedataguide.ucar.edu/climate-data/ndvi-normalized-difference-vegetation-index-noaa-avhrr)  
472 [noaa-avhrr](https://climatedataguide.ucar.edu/climate-data/ndvi-normalized-difference-vegetation-index-noaa-avhrr)). To calculate available greenspace, we extracted the proportion of 2011 NLCD Land  
473 Cover 30-m resolution raster cells within each fixed-radius buffer that were classified as forest,  
474 shrubland, herbaceous, wetland, and developed open space (which included urban green spaces).

475  
476 *Seasonality* – Because weather that defines each calendar season varies across our sampled  
477 longitudinal gradient, we used daily average temperature (i.e., mean temperature on the day of a  
478 given detection event) as a continuous covariate to describe seasonality. For each day and  
479 location of a detection event, we recorded the daily average temperature from the National  
480 Climatic Data Center using the R package *rnoaa* (Chamberlain, 2020). We used data from the  
481 nearest weather station to each city that recorded daily weather during our study period (Table  
482 S5).

483  
484 *Quantifying the influence of urban characteristics on diel patterns*  
485 By splitting diel time into  $k$  in  $1, \dots, K$  categories, we estimated the probability a detection event  
486 occurs in each category for each species. To do so, we let  $y_i$  be the time category of the  $i^{\text{th}}$  in  
487  $1, \dots, I$  detection events, and assume it is a Categorical random variable, where  $\phi$  is a probability  
488 vector of the  $K$  categories  $\phi = [\phi_1 \phi_2 \phi_3 \phi_4 \phi_5]$ ,  $\phi_1 = 1 - \phi_2 - \phi_3 - \phi_4 - \phi_5$ , and  $\mathbf{1} \cdot \phi = 1$   
489 such that:

$$y_i \sim \text{Categorical}(\phi). \quad (1)$$

491  
492 To understand mechanistic changes in species-specific diel activity patterns and assess the  
493 influence that each predictor variable had on the temporal activity of each species, we let  $\phi_i$  be a  
494 function of covariates with the softmax function,

$$\phi_{i,k} = \frac{\exp(\lambda_{i,k})}{\sum_{k=1}^K \exp(\lambda_{i,k})} \quad (2)$$

496  
497 where  $\lambda_{i,k}$  is the log-linear predictor for detection event  $i$  and category  $k$ . We set our reference  
498 category as ‘day’ (i.e.,  $k = 1$ ). In our model the log-linear predictor of each outcome is then

499

$$\lambda_{i,k} = \begin{cases} \log(\alpha_{i,k}) & k = 1 \\ \mathbf{x}_j^T \boldsymbol{\beta}_{j,k} + \beta_{c[i],k} + \log(\alpha_{i,k}) & k > 1. \end{cases} \quad (3)$$

500 In Eq. 3,  $\boldsymbol{\beta}_{j,k}$  coefficients correspond to the effect of greenspace availability, impervious cover,  
501 vegetation cover, human population density, and daily average temperature for  $k > 1$ . As  
502 detection events within each city may not be wholly independent, we included a random  
503 intercept for city,  $\beta_{c[i],k}$ , where  $\mathbf{c}$  is a vector of length  $I$  that denotes which city detection event  $i$   
504 occurred (Gelman and Hill, 2006). Finally, to account for the different amount of time available  
505 to animals among the  $K$  categories, we also included a log offset term,  $\log(\alpha_{k,i})$ , where  $\alpha_{k,i}$  is the  
506 number of hours available in category  $k$  at the time of detection event  $i$ . This form of multinomial  
507 regression is equivalent to a logistic regression model with a spatial categorical covariate with  $K$   
508 levels, where the offset accounts for varying availability. As such, our model approximates the  
509 weighted distribution used in resource selection functions assuming an exponential link (Hooten  
510 et al., 2017). Exponentiated coefficient estimates greater than one indicates ‘selection’ and less  
511 than one indicates ‘avoidance’, relative to the day reference category.

512

513 Because we considered ‘day’ ( $k = 1$ ) as our reference outcome, we set  $\beta_{c[i],1} = 0$  and  $\beta_{j,1} = 0$  (Eq.  
514 3). The remaining  $\boldsymbol{\beta}_{j,k}$  parameters were given Laplace( $0, \pi$ ) priors as a form of categorical  
515 LASSO regularization (Tutz et al., 2015). We took a fully Bayesian approach to variable  
516 selection by estimating the hyperparameter  $\pi$  (van Erp et al., 2019), which was given a  
517 uniform( $0.001, 10$ ) prior distribution.  $\beta_{c[i],k}$  was given a Normal( $\mu_k, \tau_k$ ) prior for each city where  $\mu_k$   
518  $\sim$  Normal( $0, 10$ ) and  $\tau_k \sim$  Gamma( $1, 1$ ).

519

520 Models were fit using an Markov Chain Monte Carlo (MCMC) algorithm implemented in JAGS  
521 ver 4.2.0 (Plummer, 2003) using the *runjags* package (Denwood, 2016) in R. Fourteen parallel  
522 chains were each run from random starting values. The first 20,000 iterations from each chain  
523 were discarded and every 7<sup>th</sup> iteration was kept to reduce autocorrelation among the samples. A  
524 total of 75,000 iterations were obtained for each model. Model convergence was assessed by  
525 checking that the Gelman-Rubin diagnostic statistic for each parameter was  $< 1.1$  (Gelman and  
526 Rubin, 1992) and by visually inspecting the trace plots of MCMC sample

527

## 528 **Acknowledgements**

529 The authors would like to thank all the field technicians, students, and assistants associated  
530 with the Urban Wildlife Information Network for data collection and photo processing. We  
531 would also like to thank the operations, facilities, and administrative staff at our respective  
532 institutions as their work behind the scenes is vital to our research. Funding was provided  
533 by the Abra Prentice-Wilkin Foundation and the EJK Foundation. We would also like to thank  
534 N. Clemente, J. Kimlinger, and Pariveda Solutions for their help with an application to store and  
535 tag our camera trap images.

536

537 **Competing Interest Statement:** No Competing Interests

538

## 539 **References**

540 Berger J. 2007. Fear, human shields and the redistribution of prey and predators in protected  
541 areas. *Biol Lett* **3**:620–623. doi:10.1098/rsbl.2007.0415



- 542 Blecha KA, Boone RB, Alldredge MW. 2018. Hunger mediates apex predator's risk avoidance  
543 response in wildland–urban interface. *J Anim Ecol* **87**:609–622. doi:10.1111/1365-  
544 2656.12801
- 545 Chamberlain S. 2020. rnoaa: “NOAA” Weather Data from R. R package version 0.9.6.
- 546 Clinchy M, Zanette LY, Roberts D, Suraci JP, Buesching CD, Newman C, Macdonald DW.  
547 2016. Fear of the human “super predator” far exceeds the fear of large carnivores in a  
548 model mesocarnivore. *Behav Ecol* **27**:1826–1832. doi:10.1093/beheco/arw117
- 549 Cove MV, Kays R, Bontrager H, Bresnan C, Lasky M, Frerichs T, Klann R, Lee Jr. TE, Crockett  
550 SC, Crupi AP, Weiss KCB, Rowe H, Sprague T, Schipper J, Tellez C, Lepczyk CA,  
551 Fantle-Lepczyk JE, LaPoint S, Williamson J, Fisher-Reid MC, King SM, Bebeko AJ,  
552 Chrysafis P, Jensen AJ, Jachowski DS, Sands J, MacCombie KA, Herrera DJ, van der  
553 Merwe M, Knowles TW, Horan III RV, Rentz MS, Brandt LSE, Nagy C, Barton BT,  
554 Thompson WC, Maher SP, Darracq AK, Hess G, Parsons AW, Wells B, Roemer GW,  
555 Hernandez CJ, Gompfer ME, Webb SL, Vanek JP, Lafferty DJR, Bergquist AM,  
556 Hubbard T, Forrester T, Clark D, Cincotta C, Favreau J, Facka AN, Halbur M,  
557 Hammerich S, Gray M, Rega-Brodsky CC, Durbin C, Flaherty EA, Brooke JM, Coster  
558 SS, Lathrop RG, Russell K, Bogan DA, Cliché R, Shamon H, Hawkins MTR, Marks SB,  
559 Lonsinger RC, O'Mara MT, Compton JA, Fowler M, Barthelmess EL, Andy KE, Belant  
560 JL, Beyer Jr. DE, Kautz TM, Scognamillo DG, Schalk CM, Leslie MS, Nasrallah SL,  
561 Ellison CN, Ruthven C, Fritts S, Tleimat J, Gay M, Whittier CA, Neiswenter SA,  
562 Pelletier R, DeGregorio BA, Kuprewicz EK, Davis ML, Dykstra A, Mason DS, Baruzzi  
563 C, Lashley MA, Risch DR, Price MR, Allen ML, Whipple LS, Sperry JH, Hagen RH,  
564 Mortelliti A, Evans BE, Studds CE, Sirén APK, Kilborn J, Sutherland C, Warren P,  
565 Fuller T, Harris NC, Carter NH, Trout E, Zimova M, Giery ST, Iannarilli F, Higdon SD,  
566 Revord RS, Hansen CP, Millspaugh JJ, Zorn A, Benson JF, Wehr NH, Solberg JN,  
567 Gerber BD, Burr JC, Sevin J, Green AM, Şekercioğlu ÇH, Pendergast M, Barnick KA,  
568 Edelman AJ, Wasdin JR, Romero A, O'Neill BJ, Schmitz N, Alston JM, Kuhn KM,  
569 Lesmeister DB, Linnell MA, Appel CL, Rota C, Stenglein JL, Anhalt-Depies C, Nelson  
570 C, Long RA, Jo Jaspers K, Remine KR, Jordan MJ, Davis D, Hernández-Yáñez H, Zhao  
571 JY, McShea WJ. 2021. SNAPSHOT USA 2019: a coordinated national camera trap  
572 survey of the United States. *Ecology* **102**:e03353. doi:10.1002/ecy.3353
- 573 Cox DTC, Gardner AS, Gaston KJ. 2021. Diel niche variation in mammals associated with  
574 expanded trait space. *Nat Commun* **12**:1753. doi:10.1038/s41467-021-22023-4
- 575 Denwood MJ. 2016. runjags: An R Package Providing Interface Utilities, Model Templates,  
576 Parallel Computing Methods and Additional Distributions for MCMC Models in JAGS. *J*  
577 *Stat Softw* **71**:25.
- 578 Dunlap T. 1988. Saving America's Wildlife: Ecology and the American Mind, 1850-1990. New  
579 Jersey, USA: Princeton University Press.
- 580 Etter DR, Hollis KM, Van Deelen TR, Ludwig DR, Chelsovig JE, Anchor CL, Warner RE. 2002.  
581 Survival and Movements of White-Tailed Deer in Suburban Chicago, Illinois. *J Wildl*  
582 *Manag* **66**:500–510. doi:10.2307/3803183
- 583 Farris ZJ, Gerber BD, Karpanty S, Murphy A, Andrianjakarivelo V, Ratelolahy F, Kelly MJ.  
584 2015. When carnivores roam: temporal patterns and overlap among Madagascar's native  
585 and exotic carnivores. *J Zool* **296**:45–57. doi:10.1111/jzo.12216
- 586 Fidino M, Barnas GR, Lehrer EW, Murray MH, Magle SB. 2020. Effect of Lure on Detecting  
587 Mammals with Camera Traps. *Wildl Soc Bull* **44**:543–552. doi:10.1002/wsb.1122

- 588 Fidino M, Gallo T, Lehrer EW, Murray MH, Kay CAM, Sander HA, MacDougall B, Salsbury  
589 CM, Ryan TJ, Angstmann JL, Amy Belaire J, Dugelby B, Schell CJ, Stankowich T,  
590 Amaya M, Drake D, Hursh SH, Ahlers AA, Williamson J, Hartley LM, Zellmer AJ,  
591 Simon K, Magle SB. 2021. Landscape-scale differences among cities alter common  
592 species' responses to urbanization. *Ecol Appl* **31**:e02253. doi:10.1002/eap.2253
- 593 Fidino MA, Lehrer EW, Magle SB. 2016. Habitat Dynamics of the Virginia Opossum in a  
594 Highly Urban Landscape. *Am Midl Nat* **175**:155–167. doi:10.1674/0003-0031-175.2.155
- 595 Frazer L. 2005. Paving paradise: the peril of impervious surfaces. *Environ Health Perspect*  
596 **113**:A456–A462. doi:10.1289/ehp.113-a456
- 597 Gallo T, Fidino M, Lehrer EW, Magle S. 2019. Urbanization alters predator-avoidance  
598 behaviours. *J Anim Ecol* **88**:793–803. doi:10.1111/1365-2656.12967
- 599 Gaston KJ. 2019. Nighttime Ecology: The “Nocturnal Problem” Revisited. *Am Nat* **193**:481–  
600 502.
- 601 Gaynor KM, Hojnowski CE, Carter NH, Brashares JS. 2018. The influence of human  
602 disturbance on wildlife nocturnality. *Science* **360**:1232–1235.  
603 doi:10.1126/science.aar7121
- 604 Gehrt SD, Anchor C, White LA. 2009. Home Range and Landscape Use of Coyotes in a  
605 Metropolitan Landscape: Conflict or Coexistence? *J Mammal* **90**:1045–1057.
- 606 Gelman A, Hill J. 2006. Data Analysis Using Regression and Multilevel/Hierarchical Models, 1  
607 edition. ed. Cambridge ; New York: Cambridge University Press.
- 608 Gelman A, Rubin DB. 1992. Inference from iterative simulation using multiple sequences. *Stat*  
609 *Sci* **7**:457–472.
- 610 Glista DJ, DeVault TL, DeWoody JA. 2009. A review of mitigation measures for reducing  
611 wildlife mortality on roadways. *Landsc Urban Plan* **91**:1–7.  
612 doi:10.1016/j.landurbplan.2008.11.001
- 613 Gosselink TE, Van Deelen TR, Warner RE, Joselyn MG. 2003. Temporal Habitat Partitioning  
614 and Spatial Use of Coyotes and Red Foxes in East-Central Illinois. *J Wildl Manag* **67**:90–  
615 103. doi:10.2307/3803065
- 616 Grinder M, Krausman P. 2001. Morbidity-mortality factors and survival of an urban coyote  
617 population in Arizona. *J Wildl Dis* **37**.
- 618 Grinder MI, Krausman PR. 2001. Home Range, Habitat Use, and Nocturnal Activity of Coyotes  
619 in an Urban Environment. *J Wildl Manag* **65**:887–898. doi:10.2307/3803038
- 620 Homer CG, Dewitz J, Yang L, Jin S, Danielson P, Xian, Coulston J, Herold N, Wickham J,  
621 Megown J. 2015. Completion of the 2011 National Land Cover Database for the  
622 conterminous United States – representing a decade of land cover change information.  
623 *Photogramm Eng Remote Sens* **81**:345–353.
- 624 Hooten MB, Johnson DS, McClintock BT, Morales JM. 2017. Animal movement: statistical  
625 models for telemetry data. CRC press.
- 626 Hunt VM, Magle SB, Vargas C, Brown AW, Lonsdorf EV, Sacerdote AB, Sorley EJ, Santymire  
627 RM. 2014. Survival, abundance, and capture rate of eastern cottontail rabbits in an urban  
628 park. *Urban Ecosyst* **17**:547–560. doi:10.1007/s11252-013-0334-z
- 629 Kanda LL. 2005. Winter energetics of Virginia opossums *Didelphis virginiana* and implications  
630 for the species' northern distributional limit. *Ecography* **28**:731–744.  
631 doi:10.1111/j.2005.0906-7590.04173.x
- 632 Kitchen AM, Gese EM, Schauster ER. 2000. Changes in coyote activity patterns due to reduced  
633 exposure to human persecution. *Can J Zool* **78**:853–857. doi:10.1139/z00-003

- 634 Kronfeld-Schor N, Dayan T. 2003. Partitioning of Time as an Ecological Resource. *Annu Rev*  
635 *Ecol Evol Syst* **34**:153–181. doi:10.1146/annurev.ecolsys.34.011802.132435
- 636 Kruschke JK. 2011. Doing Bayesian Data Analysis, 2nd ed. London, UK: Academic Press.
- 637 Lehrer EW, Gallo T, Fidino M, Kilgour RJ, Wolff PJ, Magle SB. 2021. Urban bat occupancy is  
638 highly influenced by noise and the location of water: Considerations for nature-based  
639 urban planning. *Landsc Urban Plan* **210**:104063. doi:10.1016/j.landurbplan.2021.104063
- 640 Levy O, Dayan T, Porter WP, Kronfeld-Schor N. 2019. Time and ecological resilience: can  
641 diurnal animals compensate for climate change by shifting to nocturnal activity? *Ecol*  
642 *Monogr* **89**:e01334. doi:10.1002/ecm.1334
- 643 Magle SB, Fidino M, Lehrer EW, Gallo T, Mulligan MP, Ríos MJ, Ahlers AA, Angstmann J,  
644 Belaire A, Dugelby B, Gramza A, Hartley L, MacDougall B, Ryan T, Salsbury C, Sander  
645 H, Schell C, Simon K, Onge SS, Drake D. 2019. Advancing urban wildlife research  
646 through a multi-city collaboration. *Front Ecol Environ* **17**:232–239. doi:10.1002/fee.2030
- 647 Magle SB, Simoni LS, Lehrer EW, Brown JS. 2014. Urban predator–prey association: coyote  
648 and deer distributions in the Chicago metropolitan area. *Urban Ecosyst* 875–891.  
649 doi:10.1007/s11252-014-0389-5
- 650 Maloney SK, Moss G, Cartmell T, Mitchell D. 2005. Alteration in diel activity patterns as a  
651 thermoregulatory strategy in black wildebeest (*Connochaetes gnou*). *J Comp Physiol A*  
652 **191**:1055–1064. doi:10.1007/s00359-005-0030-4
- 653 McDonnell MJ, Pickett STA. 1990. Ecosystem Structure and Function along Urban-Rural  
654 Gradients: An Unexploited Opportunity for Ecology. *Ecology* **71**:1232–1237.  
655 doi:10.2307/1938259
- 656 Morey PS, Gese EM, Gehrt S. 2007. Spatial and Temporal Variation in the Diet of Coyotes in  
657 the Chicago Metropolitan Area. *Am Midl Nat* **158**:147–161. doi:10.1674/0003-  
658 0031(2007)158[147:SATVIT]2.0.CO;2
- 659 Mueller MA, Drake D, Allen ML. 2018. Coexistence of coyotes (*Canis latrans*) and red foxes  
660 (*Vulpes vulpes*) in an urban landscape. *PLOS ONE* **13**:e0190971.  
661 doi:10.1371/journal.pone.0190971
- 662 Murray MH, St. Clair CC. 2017. Predictable features attract urban coyotes to residential yards. *J*  
663 *Wildl Manag* **81**:593–600. doi:10.1002/jwmg.21223
- 664 Murray MH, St. Clair CC. 2015. Individual flexibility in nocturnal activity reduces risk of road  
665 mortality for an urban carnivore. *Behav Ecol* **26**:1520–1527. doi:10.1093/beheco/arv102
- 666 Oleson KW, Monaghan A, Wilhelmi O, Barlage M, Brunsell N, Feddema J, Hu L, Steinhoff DF.  
667 2015. Interactions between urbanization, heat stress, and climate change. *Clim Change*  
668 **129**:525–541. doi:10.1007/s10584-013-0936-8
- 669 Pacione Michael. 2009. Urban geography : a global perspective, 3rd ed. ed. London ; Routledge.
- 670 Plummer M. 2003. A program for analysis of Bayesian graphical models using Gibbs  
671 sampling Proceedings of the Third International Workshop on Distributed Statistical  
672 Computing. Vienna, Austria: R Foundations for Statistical Computing. pp. 125–133.
- 673 R Core Team. 2019. R: A language and environment for statistical computing. Vienna, Austria:  
674 R Foundation for Statistical Computing.
- 675 Radeloff VC, Helmers DP, Kramer HA, Mockrin MH, Alexandre PM, Bar-Massada A, Butsic V,  
676 Hawbaker TJ, Martinuzzi S, Syphard AD, Stewart SI. 2018. Rapid growth of the US  
677 wildland-urban interface raises wildfire risk. *Proc Natl Acad Sci* **115**:3314–3319.  
678 doi:10.1073/pnas.1718850115

- 679 Ridout MS, Linkie M. 2009. Estimating overlap of daily activity patterns from camera trap data.  
680 *J Agric Biol Environ Stat* **14**:322–337. doi:10.1198/jabes.2009.08038
- 681 Riley SPD, Sauvajot RM, Fuller TK, York EC, Kamradt DA, Bromley C, Wayne RK. 2003.  
682 Effects of Urbanization and Habitat Fragmentation on Bobcats and Coyotes in Southern  
683 California. *Conserv Biol* **17**:566–576. doi:10.1046/j.1523-1739.2003.01458.x
- 684 Rosatte RC. 2000. Management of raccoons (*Procyon lotor*) in Ontario, Canada: Do human  
685 intervention and disease have significant impact on raccoon populations? *Mammalia*  
686 **64**:369–390. doi:10.1515/mamm.2000.64.4.369
- 687 Schoener TW. 1974. Resource Partitioning in Ecological Communities. *Science* **185**:27.  
688 doi:10.1126/science.185.4145.27
- 689 Schwalb-Willmann J. 2019. getSpatialData: R package version 0.0.4.
- 690 Shannon G, Cordes LS, Hardy AR, Angeloni LM, Crooks KR. 2014. Behavioral Responses  
691 Associated with a Human-Mediated Predator Shelter. *PLOS ONE* **9**:e94630.  
692 doi:10.1371/journal.pone.0094630
- 693 Stone B. 2012. The City and the Coming Climate: Climate Change in the Places We Live.  
694 Cambridge University Press.
- 695 Strickland MD, McDonald LL. 2006. Introduction to the Special Section on Resource Selection.  
696 *J Wildl Manag* **70**:321–323.
- 697 Swanson A, Kosmala M, Lintott C, Simpson R, Smith A, Packer C. 2015. Snapshot Serengeti,  
698 high-frequency annotated camera trap images of 40 mammalian species in an African  
699 savanna. *Sci Data* **2**:150026. doi:10.1038/sdata.2015.26
- 700 Tambling CJ, Minnie L, Meyer J, Freeman EW, Santymire RM, Adendorff J, Kerley GIH. 2015.  
701 Temporal shifts in activity of prey following large predator reintroductions. *Behav Ecol*  
702 *Sociobiol* **69**:1153–1161. doi:10.1007/s00265-015-1929-6
- 703 Thieurmel B, Elmarhraoui A. 2019. suncalc: Compute Sun Position, Sunlight Phases, Moon  
704 Position and Lunar Phase.
- 705 Tigas LA, Van Vuren DH, Sauvajot RM. 2002. Behavioral responses of bobcats and coyotes to  
706 habitat fragmentation and corridors in an urban environment. *Biol Conserv* **108**:299–306.  
707 doi:10.1016/S0006-3207(02)00120-9
- 708 Tutz G, Pöbnecker W, Uhlmann L. 2015. Variable selection in general multinomial logit models.  
709 *Comput Stat Data Anal* **82**:207–222. doi:10.1016/j.csda.2014.09.009
- 710 U.S. Census Bureau. 2010. Population, Housing Units, Area, and Density: 2010 - County --  
711 County Subdivision and Place more information 2010 Census Summary File 1.  
712 Washington, D.C. USA: U.S. Department of Commerce.
- 713 van der Vinne V, Tachinardi P, Riede SJ, Akkerman J, Scheepe J, Daan S, Hut RA. 2019.  
714 Maximising survival by shifting the daily timing of activity. *Ecol Lett* **22**:2097–2102.  
715 doi:10.1111/ele.13404
- 716 van Erp S, Oberski DL, Mulder J. 2019. Shrinkage priors for Bayesian penalized regression. *J*  
717 *Math Psychol* **89**:31–50. doi:10.1016/j.jmp.2018.12.004
- 718 Weissinger MD, Theimer TC, Bergman DL, Deliberto TJ. 2009. NIGHTLY AND SEASONAL  
719 MOVEMENTS, SEASONAL HOME RANGE, AND FOCAL LOCATION PHOTO-  
720 MONITORING OF URBAN STRIPED SKUNKS (MEPHITIS MEPHITIS):  
721 IMPLICATIONS FOR RABIES TRANSMISSION. *J Wildl Dis* **45**:388–397.  
722 doi:10.7589/0090-3558-45.2.388
- 723 Wolkovich EM, Cook BI, McLauchlan KK, Davies TJ. 2014. Temporal ecology in the  
724 Anthropocene. *Ecol Lett* **17**:1365–1379. doi:10.1111/ele.12353

- 725 Wright JD, Burt MS, Jackson VL. 2012. Influences of an Urban Environment on Home Range  
726 and Body Mass of Virginia Opossums (*Didelphis virginiana*). *Northeast Nat* **19**:77–86.  
727 Young JK, Hammill E, Breck SW. 2019. Interactions with humans shape coyote responses to  
728 hazing. *Sci Rep* **9**:20046. doi:10.1038/s41598-019-56524-6  
729
